# Supplementary material
Source: ML conference proceedings conference paper supplement (https://proceedings.neurips.cc/paper_files/paper/2023/hash/7f05193e5487287a890df7fbc3554427-Abstract.html)
Supplement: Supplementary file 1 [file 7f05193e5487287a890df7fbc3554427-Supplemental-Conference.zip]

Archive with 2 entries (2 files):
- supplementary/NeurIPS_supplementary_camera_ready.pdf
- supplementary/nips_2023.mp4
